# Supplementary material
Source: MDPI journal article supplement (https://www.mdpi.com/2673-4583/5/1/5)
Supplement: s1 [file s1]

# Supporting Information

## Molecular Emitters as a Tunable Light Source for Optical Multisensor Systems <sup>†</sup>

Anastasiia Surkova <sup>1,2,\*</sup>, Aleksandra Paderina <sup>1</sup>, Andrey Legin <sup>1</sup>, Elena Grachova <sup>1</sup>, and Dmitry Kirsanov <sup>1</sup>

<sup>1</sup> Institute of Chemistry, St. Petersburg State University, Universitetskii pr. 26, 198504 St. Petersburg, Russia; ksaniasha@list.ru (A.P.); andrey.legin@gmail.com (A.L.); e.v.grachova@mail.ru (E.G.); d.kirsanov@gmail.com (D.K.)

<sup>2</sup> Department of Analytical and Physical Chemistry, Samara State Technical University, Molodogvardeyskaya Street 244, 443100 Samara, Russia

\* Correspondence: a.surkova@spbu.ru

<sup>†</sup> Presented at the 1st International Electronic Conference on Chemical Sensors and Analytical Chemistry, 1–15 July 2021; Available online: <https://csac2021.sciforum.net/>.

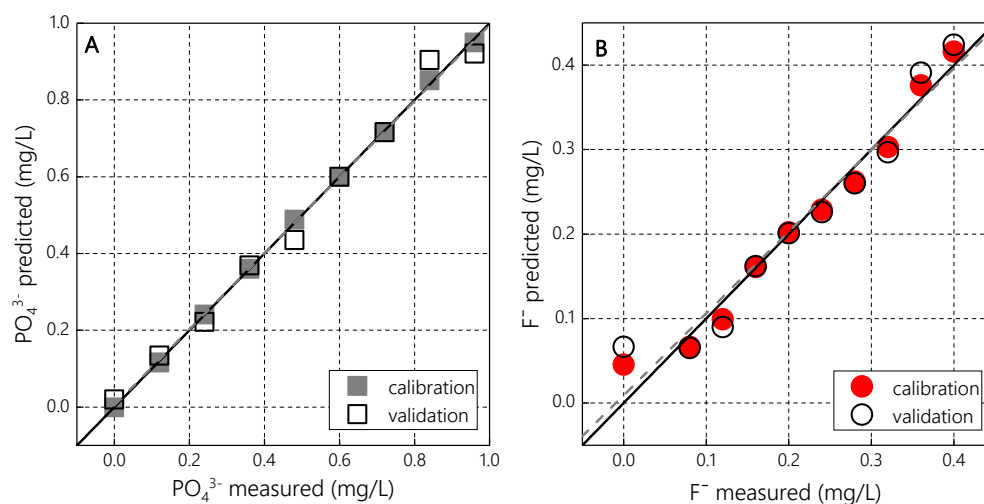

**Figure S1.** Predicted versus measured values of cross-validation for quantification of (A)  $\text{PO}_4^{3-}$  and (B)  $\text{F}^-$ .

**Citation:** Surkova, A.; Paderina, A.; Legin, A.; Grachova, E.; Kirsanov, D. Molecular Emitters as a Tunable Light Source for Optical Multisensor Systems. *Chem. Proc.* **2021**, *5*, 5. <https://doi.org/10.3390/CSAC2021-10611>

Published: 6 July 2021

**Publisher's Note:** MDPI stays neutral with regard to jurisdictional claims in published maps and institutional affiliations.

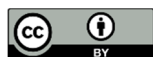

**Copyright:** © 2021 by the authors. Licensee MDPI, Basel, Switzerland. This article is an open access article distributed under the terms and conditions of the Creative Commons Attribution (CC BY) license (<https://creativecommons.org/licenses/by/4.0/>).
